# Supplementary material for: Interactive Effects of Copper Pipe, Stagnation, Corrosion Control, and Disinfectant Residual Influenced Reduction of Legionella pneumophila during Simulations of the Flint Water Crisis
Source: MDPI journal article supplement (doi:10.3390/pathogens9090730), 2020-09-04
Supplement: s1 [file s1]

**Table S1.** PCR confirmation of unique morphologies that were identified morphologically as *Legionella*. Positives, indicated by an “+”, are colonies counted as *Legionella* and correctly identified by PCR amplification of identification gene markers. Negatives, indicated by an “0”, are plates that contained no colonies morphologically identified as *Legionella* or were not confirmed by PCR. Lspp = *Legionella spp*, LP= *Legionella pneumophila*, SG1 = *Legionella pneumophila* serogroup 1. When available, all visually unique colonies were picked for colony PCR confirmation from plates during each sampling event (n = 20-12 colonies per sampling).

| Conditions          | Inoculation  |           |            | Day 47       |           |            | Day 82       |           |            | Day 175      |           |            | Day 210      |           |            |
|---------------------|--------------|-----------|------------|--------------|-----------|------------|--------------|-----------|------------|--------------|-----------|------------|--------------|-----------|------------|
|                     | <i>L spp</i> | <i>LP</i> | <i>SG1</i> | <i>L spp</i> | <i>LP</i> | <i>SG1</i> | <i>L spp</i> | <i>LP</i> | <i>SG1</i> | <i>L spp</i> | <i>LP</i> | <i>SG1</i> | <i>L spp</i> | <i>LP</i> | <i>SG1</i> |
| <b>FR</b>           | +            | +         | +          | +            | +         | 0          | +            | +         | 0          | +            | +         | +          | +            | +         | +          |
| <i>FR-CC</i>        | +            | +         | +          | +            | +         | 0          | +            | +         | 0          | +            | +         | 0          | +            | +         | 0          |
| <i>FR-NoFe</i>      | +            | +         | +          | +            | +         | 0          | +            | +         | 0          | +            | +         | +          | +            | +         | 0          |
| <i>DET</i>          | +            | +         | +          | 0            | 0         | 0          | +            | +         | 0          | +            | +         | +          | +            | +         | 0          |
| <b>DET-Cold</b>     | +            | +         | +          | +            | +         | 0          | +            | +         | 0          | +            | +         | 0          | +            | +         | 0          |
| <b>DET-Enhanced</b> | +            | +         | +          | 0            | 0         | 0          | +            | +         | 0          | 0            | 0         | 0          | 0            | 0         | 0          |
